# Supplementary material
Source: HighWire-hosted journal article supplement (http://www.annfammed.org/highwire/filestream/9012/field_highwire_adjunct_files/0/Mangin_Supp_Apps.pdf)
Supplement: Mangin_Supp_Apps.pdf [file Mangin_Supp_Apps.pdf]

**Supplemental materials for:**

Mangin D, Lawson J, Cuppage J, Shaw E, Ivanyi K, Davis A, Risdon C. Legacy drug-prescribing patterns in primary care. *Ann Fam Med*. 2018;16(6):515-520.

**Supplemental Table 1 - Anatomical Therapeutic Chemical (ATC) Codes for Legacy Drug Groups**

| <b>Antidepressants</b> |               |             |
|------------------------|---------------|-------------|
| <b>TC_ATC_NUMBER</b>   | <b>TC_ATC</b> | <b>Code</b> |
| N06AB08                | FLUVOXAMINE   | SSRIs       |
| N06AB06                | SERTRALINE    | SSRIs       |
| N06AB03                | FLUOXETINE    | SSRIs       |
| N06AB05                | PAROXETINE    | SSRIs       |
| N06AB04                | CITALOPRAM    | SSRIs       |
| N06AB10                | ESCITALOPRAM  | SSRIs       |
| N06AX16                | VENLAFAXINE   | SSNRIs      |
| N06AX21                | DULOXETINE    | SSNRIs      |

|                        |                 |                            |
|------------------------|-----------------|----------------------------|
| N06AX23                | DESVENLAFAXINE  | SSNRIs                     |
| N06AX12                | BUPROPION       | Other AntiDepress          |
| N06AX11                | MIRTAZAPINE     | Other AntiDepress          |
| N06AA09                | AMITRIPTYLINE   | Tris and NRIs              |
| N06AA10                | NORTRIPTYLINE   | Tris and NRIs              |
| <b>Bisphosphonates</b> |                 |                            |
| <b>TC_ATC_NUMBER</b>   | <b>TC_ATC</b>   | <b>TC_AHFS</b>             |
| M05BA02                | CLODRONIC ACID  | BONE RESORPTION INHIBITORS |
| M05BA07                | RISEDRONIC ACID | BONE RESORPTION INHIBITORS |
| M05BA03                | PAMIDRONIC ACID | BONE RESORPTION INHIBITORS |
| M05BA04                | ALENDRONIC ACID | BONE RESORPTION INHIBITORS |

|                               |                                        |                            |
|-------------------------------|----------------------------------------|----------------------------|
| M05BA01                       | ETIDRONIC ACID                         | BONE RESORPTION INHIBITORS |
| M05BB01                       | ETIDRONIC ACID AND CALCIUM, SEQUENTIAL | BONE RESORPTION INHIBITORS |
| M05BA08                       | ZOLEDRONIC ACID                        | BONE RESORPTION INHIBITORS |
| M05BB03                       | ALENDRONIC ACID AND CHOLECALCIFEROL    | BONE RESORPTION INHIBITORS |
| M05BX04                       | DENOSUMAB                              | BONE RESORPTION INHIBITORS |
| <b>Proton Pump Inhibitors</b> |                                        |                            |
| <b>TC_ATC_NUMBER</b>          | <b>TC_ATC</b>                          | <b>TC_AHFS</b>             |
| A02BC03                       | LANSOPRAZOLE                           | PROTON-PUMP INHIBITORS     |
| A02BC01                       | OMEPRAZOLE                             | PROTON-PUMP INHIBITORS     |
| A02BC02                       | PANTOPRAZOLE                           | PROTON-PUMP INHIBITORS     |
| A02BC04                       | RABEPRAZOLE                            | PROTON-PUMP INHIBITORS     |

|         |                           |                        |
|---------|---------------------------|------------------------|
| A02BC05 | ESOMEPRAZOLE              | PROTON-PUMP INHIBITORS |
| A02BC06 | DEXLANSOPRAZOLE           | PROTON-PUMP INHIBITORS |
| M01AE52 | Naproxen and esomeprazole | PROTON-PUMP INHIBITORS |

**Supplemental Table 2 - Validation of 4 Categories of Legacy Assignment**

| <b>Antidepressants</b>              |                      |                                 |                                   |                                     |                               |                     |                     |                   |
|-------------------------------------|----------------------|---------------------------------|-----------------------------------|-------------------------------------|-------------------------------|---------------------|---------------------|-------------------|
| <b>Item</b>                         | <b>Patient Count</b> | <b>Validation Sample, n (%)</b> | <b>Checked as Accurate, n (%)</b> | <b>Checked as Inaccurate, n (%)</b> | <b>Proportion/ Prevalence</b> | <b>Lower 95% CL</b> | <b>Upper 95% CL</b> | <b>Difference</b> |
| Legacy via Start-Stop Duration Only | 919                  | 126 (13.7)                      | 62 (49.2)                         | 64 (50.8)                           | 0.49                          | 0.41                | 0.58                | 0.17              |
| Legacy via Sum Duration Only        | 223                  | 39 (17.5)                       | 0 (0)                             | 39 (100.0)                          | 0                             | 0.00                | 0.09                | 0.09              |
| Legacy via both Methods             | 3802                 | 219 (5.8)                       | 201 (91.8)                        | 18 (8.2)                            | 0.92                          | 0.87                | 0.95                | 0.08              |
| Non-Legacy                          | 3327                 | 96 (2.9)                        | 95 (99.0)                         | 1 (1.0)                             | 0.99                          | 0.94                | 1.00                | 0.06              |
| <b>Total Patients</b>               | 8271                 | 480                             | 358                               | 122                                 |                               |                     |                     |                   |
| <b>Bisphosphonates</b>              |                      |                                 |                                   |                                     |                               |                     |                     |                   |

| Item                                | Patient Count | Validation Sample, n (%) | Checked as Accurate, n (%) | Checked as Inaccurate, n (%) | Proportion/ Prevalence | Lower 95% CL | Upper 95% CL | Difference |
|-------------------------------------|---------------|--------------------------|----------------------------|------------------------------|------------------------|--------------|--------------|------------|
| Legacy via Start-Stop Duration Only | 123           | 123 (100)                | 41 (33.3)                  | 82 (66.7)                    | NA                     | NA           | NA           | NA         |
| Legacy via Sum Duration Only        | 82            | 52 (63.4)                | 0 (0)                      | 52 (100)                     | 0.00                   | 0.00         | 0.07         | 0.07       |
| Legacy via both Methods             | 230           | 119 (51.7)               | 100 (84.0)                 | 19 (16.0)                    | 0.84                   | 0.76         | 0.90         | 0.14       |
| Non-Legacy                          | 1166          | 65 (5.6)                 | 65 (100)                   | 0 (0)                        | 1.00                   | 0.94         | 1.00         | 0.06       |
| <b>Total Patients</b>               | 1601          | 359                      | 206                        | 153                          |                        |              |              |            |
| <b>PPIs</b>                         |               |                          |                            |                              |                        |              |              |            |
| Item                                | Patient Count | Validation Sample, n (%) | Checked as Accurate, n (%) | Checked as Inaccurate, n (%) | Proportion/ Prevalence | Lower 95% CL | Upper 95% CL | Difference |
| Legacy via Start-Stop Duration Only | 633           | 124 (19.6)               | 44 (35.5)                  | 80 (64.5)                    | 0.35                   | 0.28         | 0.44         | 0.16       |
| Legacy via Sum Duration Only        | 129           | 35 (27.1)                | 0 (0)                      | 35 (100)                     | 0                      | 0            | 0.03         | 0.03       |
| Legacy via both Methods             | 2897          | 222 (7.7)                | 197 (88.7)                 | 25 (11.3)                    | 0.89                   | 0.84         | 0.92         | 0.08       |
| Non-Legacy either Method            | 2861          | 95 (3.3)                 | 95 (100)                   | 0 (0)                        | 1                      | 0.96         | 1            | 0.04       |

|                       |      |     |     |     |  |  |  |  |
|-----------------------|------|-----|-----|-----|--|--|--|--|
| <b>Total Patients</b> | 6520 | 476 | 336 | 140 |  |  |  |  |
|-----------------------|------|-----|-----|-----|--|--|--|--|

**Supplemental Table 3 - Demographic Characteristics of Patients with Legacy and Non-Legacy Prescribing**

|                              | Antidepressants       |                             |                          | Bisphosphonates     |                              |                             | Proton Pump Inhibitors |                         |                               |
|------------------------------|-----------------------|-----------------------------|--------------------------|---------------------|------------------------------|-----------------------------|------------------------|-------------------------|-------------------------------|
|                              | Legacy<br>n=1,978 (%) | Non-<br>Legacy<br>n=508 (%) | Odds Ratio<br>(95% CI)   | Legacy<br>n=163 (%) | Non-<br>Legacy n=<br>234 (%) | Odds<br>Ratio<br>(95% CI)   | Legacy n=1,531<br>(%)  | Non-Legacy<br>n=354 (%) | Odds Ratio<br>(95% CI)        |
| <b>Male</b>                  | 573 (29)              | 179 (35)                    | 1.3 (1.1,1.6)<br>p=0.006 | 19 (12)             | 51 (22)                      | 2.1<br>(1.2,3.9)<br>p=0.009 | 564 (37)               | 126 (36)                | 0.95<br>(0.74,1.2)<br>p=0.649 |
| <b>Female</b>                | 1,401 (71)            | 327 (64)                    |                          | 144 (88)            | 183 (78)                     |                             | 965 (63)               | 228 (64)                |                               |
| <b>Non-Binary</b>            | 4 (0.2)               | 2 (0.1)                     |                          | 0 (0)               | 0 (0)                        |                             | 2 (0.1)                | 0 (0)                   |                               |
| <b>Mean Age [years] (SD)</b> | 53 (15.9)             | 47 (18.8)                   |                          | 76 (10.3)           | 73 (12.5)                    |                             | 63.8 (15.2)            | 55.7 (17.2)             |                               |
